# Supplementary material for: A VirB4 ATPase of the mobile accessory genome orchestrates core genome-encoded features of physiology, metabolism, and virulence of Pseudomonas aeruginosa TBCF10839
Source: Front Cell Infect Microbiol. 2023 Jul 27;13:1234420. doi: 10.3389/fcimb.2023.1234420 (PMC10413270; doi:10.3389/fcimb.2023.1234420)
Supplement: Supplementary Table 1 — Gene chip comparison of the gene expression of TBCF10839 and the D8A6 mutant grown aerobically in ABC minimal medium: Significantly higher mRNA transcript levels in the D8A6 mutant. [file Table_1.xlsx]

## Sheet: Tabelle1
Locus	Annotation	Upregulation in D8A6 mutant compared to TBCF10839
PA0013	conserved hypothetical protein	2.42731
PA0046	hypothetical protein	2.61341
PA0100	hypothetical protein	1.9338
PA0165	hypothetical protein	3.27402
PA0182	probable short-chain dehydrogenase	2.15003
PA0187	hypothetical protein	4.28333
PA0207	probable transcriptional regulator	2.32345
PA0323	probable binding protein component of ABC transporter	5.69658
PA0478	probable N-acetyltransferase	2.86477
PA0511	nirJ, heme d1 biosynthesis protein NirJ	5.43319
PA0512	nirH	17.9
PA0513	nirG	5.44893
PA0515	nirD, probable transcriptional regulator	20.1
PA0516	nirF, heme d1 biosynthesis protein NirF	15.3
PA0517	nirC, probable c-type cytochrome precursor	11.4
PA0518	nirM, cytochrome c-551 precursor	6.4
PA0519	nirS, nitrite reductase precursor	3.07376
PA0527	dnr, transcriptional regulator Dnr	3.33592
PA0561	hypothetical protein	6.5
PA0624	hypothetical protein	2.28401
PA0627	conserved hypothetical protein	1.74234
PA0637	conserved hypothetical protein	1.85395
PA0684	hxcZ, type II secretion system protein	2.79476
PA0697	hypothetical protein	3.76239
PA0719	hypothetical protein of bacteriophage Pf1	2.5125
PA0811	probable MFS transporter	5.50117
PA0845	cerN, alkaline caramidase	2.4885
PA0881	hypothetical protein	2.88278
PA1024	NADH:quinone reductase	1.57589
PA1052	conserved hypothetical protein	2.13255
PA1070	braG, branched-chain amino acid transport protein BraG	3.26266
PA1071	braF, branched-chain amino acid transport protein BraF	2.81903
PA1076	hypothetical protein	2.16252
PA1181	conserved hypothetical protein	2.25316
PA1204	NAD(P)H quinone oxidoreductase	1.8702
PA1236	probable MFS transporter	2.46622
PA1328	probable transcriptional regulator	2.5091
PA1367	hypothetical protein	3.60784
PA1497	probable transporter	2.34747
PA1531	hypothetical protein	2.39761
PA1548	conserved hypothetical protein	2.0725
PA1601	probable aldehyde dehydrogenase	2.01165
PA1609	fabB, beta-ketoacyl-ACP synthase I	2.49514
PA1610	fabA, beta-hydroxydecanoyl-ACP dehydrase	2.46385
PA1849	conserved hypothetical protein	3.39857
PA1852	hypothetical protein	2.00585
PA1888	hypothetical protein	3.50175
PA1907	hypothetical protein	2.55944
PA1909	hypothetical protein	2.69557
PA1920	class III (anaerobic) ribonucleoside- triphosphate reductase subunit, NdrD	3.62507
PA1921	hypothetical protein	4.05539
PA2057	TonB-dependent receptor, SppR	1.67888
PA2064	pcoB, copper resistance protein B precursor	1.56197
PA2088	hypothetical protein	3.47163
PA2105	probable acetyltransferase	2.83636
PA2138	ligD, multifunctional non-homologous end joining protein LigD	2.23939
PA2211	conserved hypothetical protein	2.66187
PA2228	hypothetical protein	1.94444
PA2376	probable transcriptional regulator	1.79798
PA2399	pvdD, pyoverdine synthetase D	8
PA2408	fpvD	4.93518
PA2438	hypothetical protein	2.29193
PA2514	antC, anthranilate dioxygenase reductase	4.66518
PA2536	probable phosphatidate cytidylyltransferase	2.18392
PA2566	conserved hypothetical protein	11.0973
PA2688	pfeA, ferric enterobactin receptor precursor PfeA	4.96591
PA2785	conserved hypothetical protein	2.52833
PA2924	hisQ, histidine transport system permease HisQ	1.98678
PA3153	wzx, O-antigen translocase	8.8
PA3231	hypothetical protein	2.5654
PA3377	conserved hypothetical protein	1.80355
PA3432	hypothetical protein	3.0396
PA3442	probable ATP-binding component of ABC transporter	3.1295
PA3443	probable permease of ABC transporter	2.61146
PA3444	conserved hypothetical protein	2.53939
PA3562	fruI, phosphotransferase system transporter enzyme I, FruI	1.84997
PA3575	hypothetical protein	3.33861
PA3608	potB, polyamine transport protein PotB	3.03429
PA3641	probable amino acid permease	2.86579
PA3718	probable MFS transporter	4.41441
PA3762	hypothetical protein	2.5874
PA3766	probable aromatic amino acid transporter	2.20086
PA3784	hypothetical protein	2.11165
PA3785	putative copper binding protein	2.5495
PA3879	narL, two-component response regulator NarL	2.36902
PA4067	oprG, outer membrane protein OprG precursor	3.1369
PA4070	probable transcriptional regulator	5.47917
PA4075	hypothetical protein	2.94974
PA4091	hpaA, 4-hydroxyphenylacetate 3-monooxygenase large chain	2.11857
PA4120	probable transcriptional regulator	2.02717
PA4121	conserved hypothetical protein	1.76505
PA4123	hpcC, 5-carboxy-2-hydroxymuconate semialdehyde dehydrogenase	4.92783
PA4159	fepB, ferrienterobactin-binding periplasmic protein precursor FepB	2.26586
PA4231	pchA, salicylate biosynthesis isochorismate synthase	2.73888
PA4351	olsA, ornithine lipid synthesis	1.79834
PA4357	yhgG, conserved hypothetical protein	2.19197
PA4467	hypothetical protein	2.51603
PA4526	pilB, type 4 fimbrial biogenesis protein PilB	1.63457
PA4540	hypothetical protein	3.44418
PA4549	fimT, type 4 fimbrial biogenesis protein FimT	2.04871
PA4630	hypothetical protein	2.58105
PA4637	hypothetical protein	2.23442
PA4683	hypothetical protein	3.32604
PA4770	lldP, L-lactate permease	3.8574
PA4772	probable ferredoxin	5.65249
PA4811	fdnH, nitrate-inducible formate dehydrogenase, beta subunit	2.21402
PA4861	probable ATP-binding component of ABC transporter	11.3
PA4862	probable ATP-binding component of ABC transporter	4.16245
PA4893	ureG, urease accessory protein UreG	3.11266
PA4904	vanA, vanillate O-demethylase oxygenase subunit	4.68571
PA4918	pcnA, nicotinamidase, PcnA	1.8924
PA4927	conserved hypothetical protein	2.0255
PA5171	arcA, arginine deiminase	9.4
PA5172	arcB, ornithine carbamoyltransferase, catabolic	9.2
PA5173	arcC, carbamate kinase	10.5
PA5174	fabY, beta-acetoacyl-acyl carrier protein synthase FabY	2.60675
PA5249	hypothetical protein	2.06381
PA5284	hypothetical protein	3.43792
PA5392	conserved hypothetical protein	2.51746
PA5427	adhA, alcohol dehydrogenase	4.30678
PA5429	aspA, aspartate ammonia-lyase	2.94887
PA5440	probable peptidase	3.24061
