# Supplementary material for: A VirB4 ATPase of the mobile accessory genome orchestrates core genome-encoded features of physiology, metabolism, and virulence of Pseudomonas aeruginosa TBCF10839
Source: Front Cell Infect Microbiol. 2023 Jul 27;13:1234420. doi: 10.3389/fcimb.2023.1234420 (PMC10413270; doi:10.3389/fcimb.2023.1234420)
Supplement: Supplementary Table 2 — Gene chip comparison of the gene expression of TBCF10839 and the D8A6 mutant grown aerobically in ABC minimal medium: Significantly higher mRNA transcript levels in TBCF10839. [file Table_2.xlsx]

## Sheet: Tabelle1
Locus	Annotation	Fold-downregulation in D8A6 mutant compared to wild type TBCF10839
PA0027	hypothetical protein	3.16773
PA0049	hypothetical protein	3.84247
PA0050	hypothetical protein	5.17941
PA0059	osmC, osmotically inducible protein OsmC	5.53856
PA0108	coIII, cytochrome c oxidase, subunit III	3.45358
PA0111	hypothetical protein	6.64249
PA0122	aegerolysin rahU, toxin	19.2758
PA0136	probable ATP-binding component of ABC transporter	4.77381
PA0143	nuh, purine nucleosidase Nuh	4.65157
PA0144	hypothetical protein	4.24344
PA0173	probable methylesterase	4.20707
PA0199	exbD1, transport protein ExbD	3.31751
PA0263	hcpC, secreted protein Hcp, part of T6SS	45.238
PA0355	pfpI, intracellular protease PfpI	7.65448
PA0474	hypothetical protein	4.14713
PA0493	probable biotin-requiring enzyme	2.61538
PA0540	hypothetical protein	3.49033
PA0565	conserved hypothetical protein	3.71083
PA0586	conserved hypothetical protein	4.13368
PA0587	conserved hypothetical protein	12.7374
PA0588	conserved hypothetical protein	4.44662
PA0621	conserved hypothetical protein	3.9375
PA0630	hypothetical protein	8.54202
PA0645	hypothetical protein	4.76374
PA0689	lapB, low-molecular-weight alkaline phosphatase B, LapB	3.81688
PA0692	pdtB, phosphate depletion regulated two-partner secretion partner B, transporter PdtB	6.44342
PA0851	hypothetical protein	2.93086
PA0852	cpbD, chitin-binding protein CbpD precursor	14.9142
PA0855	hypothetical protein	5.12143
PA0997	pqsB, catalyzes the condensation of octanoyl-coenzyme A and 2-aminobenzoylacetate	87.3356
PA1002	phnB, anthranilate synthase component II	113.131
PA1003	mvfR, (sn pqsR), transcriptional regulator	8.78645
PA1041	probable outer membrane protein	10.5862
PA1061	conserved hypothetical protein	4.7039
PA1062	hypothetical protein	3.87699
PA1063	hypothetical protein	3.8422
PA1129	fosA, fosfomycin resistance protein, FosA	2.81447
PA1130	rhlC, rhamnosyltransferase 2	4.41418
PA1173	napB, cytochrome c-type protein NapB precursor	5.77763
PA1176	napF, ferredoxin protein NapF	13.5504
PA1177	napE, periplasmic nitrate reductase protein NapE	5.33357
PA1190	conserved hypothetical protein	3.87802
PA1216	hypothetical protein	4.1875
PA1245	hypothetical protein	13.2632
PA1250	aprI, alkaline proteinase inhibitor AprI	9.3224
PA1258	lphM, permease of ABC transporter, LphM	5.53636
PA1320	cyoD, cytochrome o ubiquinol oxidase subunit IV	3.38537
PA1327	probable protease	4.14426
PA1344	probable short-chain dehydrogenase	18.3451
PA1354	hypothetical protein	4.25173
PA1392	hypothetical protein	7.05977
PA1431	rsaL, regulatory quorum-sensing repressor protein RsaL	665.308
PA1432	lasI, autoinducer synthesis protein LasI	8.43682
PA1436	probable RND efflux transporter	11.3632
PA1511	vgrG2a, part of H2-T6SS (type VI secretion system)	6.25962
PA1562	acnA, aconitate hydratase 1	4.22095
PA1566	pauA3, glutamylpolyamine synthetase	4.20982
PA1567	conserved hypothetical protein	4.08776
PA1651	probable transporter	8.40111
PA1656	hsiA2 (part of H2-T6SS)	29.751
PA1658	hsiC2 (part of H2-T6SS)	28.597
PA1659	hsiF2 (part of H2-T6SS)	11.9926
PA1660	hsiG2 (part of H2-T6SS)	7.4955
PA1661	hsiH2 (part of H2-T6SS)	7.52426
PA1664	orfX (part of H2-T6SS)	27.7617
PA1665	fha2 (part of H2-T6SS)	121.556
PA1666	lip2 (part of H2-T6SS)	17.3754
PA1667	hsiJ2 (part of H2-T6SS)	125.35
PA1668	dotU2, DotU2 (part of H2-T6SS)	5.23299
PA1669	icmF2 (part of H2-T6SS)	9.26543
PA1670	stp1, serine/threonine phosphoprotein phosphatase Stp1	13.5708
PA1671	stk1, serine-threonine kinase Stk1	29.3086
PA1738	probable transcriptional regulator	7.95105
PA1739	probable oxidoreductase	7.99284
PA1745	hypothetical protein	3.8349
PA1869	probable acyl carrier protein	60.8167
PA1871	lasA, LasA protease precursor	5.58769
PA1876	probable ATP-binding/permease fusion ABC transporter	8.80645
PA1881	probable oxidoreductase	6.80293
PA1891	hypothetical protein	8.2974
PA1892	hypothetical protein	10.5533
PA1893	hypothetical protein	4.53618
PA1894	hypothetical protein	14.5451
PA1895	hypothetical protein	3.79422
PA1897	hypothetical protein	22.6426
PA1901	phenazine biosynthesis protein PhzC2	115.355
PA1902	phenazine biosynthesis protein PhzD2	17.0029
PA1903	phenazine biosynthesis protein PhzE2	7.8971
PA1905	phzG2, probable pyridoxamine 5' -phosphate oxidase	5.72318
PA1933	probable hydroxylase large subunit	4.11221
PA1946	rbsB, binding protein component precursor of ABC ribose transporter	3.43197
PA1951	fapF , amyloid outer membrane transporter FabF	27.1875
PA1961	probable transcriptional regulator	3.97748
PA1985	pqqA, pyrroloquinoline quinone biosynthesis protein A	5.92884
PA1987	pqqC, pyrroloquinoline quinone biosynthesis protein C	4.29264
PA2005	hbcR, ( R ) -3-hydroxybutyrate catabolism enhancer binding protein HbcR	2.86092
PA2031	hypothetical protein	4.16896
PA2037	hypothetical protein	3.37912
PA2051	probable transmembrane sensor	3.23625
PA2067	probable hydrolase	5.20776
PA2068	probable MFS transporter	11.3181
PA2081	kynB, kynurenine formamidase, KynB	6.03004
PA2106	hypothetical protein	3.88889
PA2108	probable decarboxylase	3.52863
PA2143	hypothetical protein	5.18266
PA2144	glgP, glycogen phosphorylase	8.54212
PA2153	glgB, 1,4-alpha-glucan branching enzyme	4.72871
PA2171	hypothetical protein	6.01879
PA2178	hypothetical protein	4.57393
PA2181	hypothetical protein	4.10053
PA2192	conserved hypothetical protein	5.28125
PA2193	hcnA, hydrogen cyanide synthase HcnA	31.9428
PA2194	hcnB, hydrogen cyanide synthase HcnB	24.2468
PA2195	hcnC, hydrogen cyanide synthase HcnC	14.4081
PA2213	probable porin	7.07766
PA2214	putative L-lyxonate transporter	8.23158
PA2227	vqsM, AraC-type transcriptional regulator VqsM	3.15811
PA2300	chiC, chitinase	4.45923
PA2305	ambB, non-ribosomal peptide synthetase for L-2-amino-4-methoxy-trans-3-butenoic acid (AMB)	9.50841
PA2306	ambA, LysE-type transporter for AMB	13.4358
PA2346	conserved hypothetical protein	3.04075
PA2364	lip3, Lip3 (H3-T6SS)	5.33064
PA2365	hsiB3 (H3-T6SS)	6.1736
PA2366	hsiC3 (H3-T6SS)	7.98511
PA2367	hcp3 (H3-T6SS)	20.7037
PA2375	hypothetical protein	10.6144
PA2377	hypothetical protein	2.55668
PA2392	pvdP, pyoverdine maturation enzyme PvdP tyrosinase	2.70481
PA2423	hypothetical protein	5.85014
PA2426	pvdS, sigma factor PvdS	2.6122
PA2440	hypothetical protein	3.95087
PA2441	hypothetical protein	6.2553
PA2477	dsbE, thiol:disulfide interchange protein DsbE	4.79988
PA2572	probable two-component response regulator	28.2125
PA2573	probable chemotaxis transducer	3.97239
PA2587	probable FAD-dependent monooxygenase	31.6571
PA2588	probable transcriptional regulator	5.54646
PA2591	vqsR, regulator of virulence and quorum sensing VqsR	4.80426
PA2592	probable periplasmic spermidine/putrescine-binding protein	14.3436
PA2593	qteE, quorum treshold expression element, QteE	34.6276
PA2671	hypothetical protein	3.90426
PA2717	cpo, chloroperoxidase precursor	6.40239
PA2735	type I HsdM methyltransferase	6.14803
PA2736	hypothetical protein	5.45699
PA2746	hypothetical protein	6.21478
PA2747	hypothetical protein	6.60574
PA2846	probable transcriptional regulator	2.84962
PA2926	hisP, histidine transport protein HisP	3.65952
PA2927	plaB, phospholipase B	18.9509
PA2937	hypothetical protein	6.10276
PA3104	xcpP, secretion protein XcpP	3.89604
PA3105	xcpQ, general secretion pathway protein D	4.03001
PA3149	wbpH, probable glycosyltransferase WbpH	2.71875
PA3156	wbpD, UDP-2-acetamido-3-amino-2,3-dideoxy-d-glucuronic acid N-acetyltransferase, WbpD	2.3961
PA3159	wbpA, UDP-N-acetyl-d-glucosamine 6-Dehydrogenase WbpA	4.01739
PA3291	tli1, T6SS secretion effector Tli1	3.43487
PA3293	hypothetical protein	4.49587
PA3311	nbda, c-di-GMP-specific phosphodiesterase NbdA	6.63824
PA3326	clpP2, ClpP protease positively regulates alginate overexpression	26.7823
PA3327	probable non-ribosomal peptide synthetase	15.4989
PA3330	probable short chain dehydrogenase	69.6323
PA3331	cytochrome P450	58.5527
PA3333	fabH2, 3-oxoacyl-[acyl-carrier-protein] synthase III	20.6814
PA3334	acp3, acyl carrier protein 3 Acp3	77.9222
PA3346	hsbR, HptB-dependent secretion and biofilm regulator HsbR	4.21897
PA3361	lecB, fucose-binding lectin PA-IIL	4.96039
PA3369	hypothetical protein	3.82191
PA3409	hasS, haem assimilation system sensor HasS	2.92935
PA3418	ldh, leucine dehydrogenase	4.44322
PA3476	rhlL, autoinducer synthesis protein RhlL	10.6861
PA3477	rhlR, transcriptional regulator RhlR	12.2845
PA3478	rhlB, rhamnosyltransferase chain B	11.6577
PA3479	rhlA, rhamnosyltransferase chain A	29.7216
PA3519	hypothetical protein	8.15158
PA3535	probable serine protease	9.13888
PA3550	algF, alginate o-acetyltransferase AlgF	14.4481
PA3690	probable metal-transporting P-type ATPase	7.01402
PA3723	probable FMN oxidoreductase	4.35504
PA3724	lasB, elastase LasB	16.5868
PA3870	moaA1, molybdopterin biosynthetic protein A1	4.31538
PA3871	probable peptidyl-prolyl cis-trans isomerase, PpiC-type	4.18584
PA3889	opuCC, OpuC ormoprotectant ABC transporter, periplasmic substrate-binding protein, OpuCC	4.6565
PA3891	opuCA, OpuC osmoprotectant ABC transporter, ATP-binding protein, OpuCA	5.63221
PA3906	co-chaperone, co-TecT (involved in T6SS mediated effector secretion)	131.288
PA3907	tseT, TOX-REase-5 domain-containing effector, TseT (part of T6SS)	29.5344
PA3908	tsiT, immunity protein, TsiT (part of T6SS)	173.699
PA3923	hypothetical protein	3.19627
PA3928	hypothetical protein	7.45465
PA3930	cioA, cyanide insensitive terminal oxidase	4.49508
PA3945	conserved hypothetical protein	3.3192
PA3959	hypothetical protein	3.65518
PA4071	hypothetical protein	2.80449
PA4129	hypothetical protein	16.6053
PA4130	nirA, ferredoxin-dependent nitrite reductase, NirA	24.1819
PA4132	mpaR, MvfR-mediated PQS and anthranilate regulator MpaR	8.06389
PA4133	cytochrome c oxidase subunit (cbb3-type)	40.6105
PA4134	hypothetical protein	35.2715
PA4139	hypothetical protein	138.431
PA4141	hypothetical protein	61.3268
PA4142	probable secretion protein	18.5292
PA4143	cvaB (syn cyaB), probable toxin transporter	8.1494
PA4175	piv, protease IV	5.51592
PA4190	probable FAD-dependent monooxygenase	6.50063
PA4209	phzM, probable phenazine-specific methyltransferase	37.5759
PA4228	pchD, pyochelin biosynthesis protein PchD	3.22682
PA4296	pprB, two-component response regulator, PprB	3.92412
PA4471	hypothetical protein	3.45569
PA4496	dppA1, probable binding protein component of ABC transporter	6.05532
PA4500	dppA3, probable binding protein component of ABC transporter	4.28771
PA4590	pra, protein activator	5.49409
PA4738	conserved hypothetical protein	14.8284
PA4739	conserved hypothetical protein	21.4296
PA4778	cueR, negative regulator of H2-T6SS dependent copper binding, regulator of surfing motility, CueR	6.97657
PA4786	probable short-chain dehydrogenase	3.49174
PA4818	conserved hypothetical protein	2.90449
PA4820	hypothetical protein	3.39474
PA4828	conserved hypothetical protein	10.3385
PA4829	lpd3, dihydrolipoamide dehydrogenase 3	5.11397
PA4869	hypothetical protein	4.37152
PA4876	osmE, osmotically inducible lipoprotein OsmE	6.3176
PA4925	conserved hypothetical protein	10.7915
PA5086	tli5b1, type VI secretion lipase immunity protein, Tli5b1	3.61266
PA5188	probable 3-hydroxyacyl-CoA dehydrogenase	3.26136
PA5219	hypothetical protein	4.44481
PA5220	hypothetical protein	11.0111
PA5231	probable ATP-binding/permease fusion ABC transporter	4.42658
PA5232	conserved hypothetical protein	5.57241
PA5359	hypothetical protein	2.96409
PA5383	conserved hypothetical protein	3.67865
PA5388	caiX, periplasmic carnitine binding protein CaiX	3.02874
PA5401	hypothetical protein	6.65023
PA5446	hypothetical protein	10.3151
PA5460	hypothetical protein	8.88695
PA5482	hypothetical protein	16.3838
