# Supplementary material for: A VirB4 ATPase of the mobile accessory genome orchestrates core genome-encoded features of physiology, metabolism, and virulence of Pseudomonas aeruginosa TBCF10839
Source: Front Cell Infect Microbiol. 2023 Jul 27;13:1234420. doi: 10.3389/fcimb.2023.1234420 (PMC10413270; doi:10.3389/fcimb.2023.1234420)
Supplement: Supplementary Table 3 — Fermentation of wild type TBCF10839 and D8A6 mutant in mineral medium with 40 mM glucose: Metabolites identified by GLC/MS in the mid-exponential and early stationary growth phase. [file Table_3.xlsx]

## Sheet: alle Metabolite
			Glucose exp TB wt	Glucose exp TB wt	Glucose exp TB wt	Glucose exp TB wt	Glucose exp TB wt	Glucose exp TB wt	Glucose exp D8A6	Glucose exp D8A6	Glucose exp D8A6	Glucose exp D8A6	Glucose exp D8A6	Glucose exp D8A6	Glucose stat TB wt	Glucose stat TB wt	Glucose stat TB wt	Glucose stat TB wt	Glucose stat TB wt	Glucose stat TB wt	Glucose stat D8A6	Glucose stat D8A6	Glucose stat D8A6	Glucose stat D8A6	Glucose stat D8A6	Glucose stat D8A6
Metabolite	KeggNumber	ID-Number	080905-efr-01-TBwt-exp	080905-efr-02-TBwt-exp	080905-efr-03-TBwt-exp	080905-efr-04-TBwt-exp	080905-efr-05-TBwt-exp	080905-efr-06-TBwt-exp	080211-eho-01-D8A6-exp	080211-eho-02-D8A6-exp	080211-eho-03-D8A6-exp	080211-eho-04-D8A6-exp	080211-eho-05-D8A6-exp	080211-eho-06-D8A6-exp	080905-efr-07-TBwt-stat	080905-efr-08-TBwt-stat	080905-efr-09-TBwt-stat	080905-efr-10-TBwt-stat	080905-efr-11-TBwt-stat	080905-efr-12-TBwt-stat	080207-eho-01-D8A6-stat	080207-eho-02-D8A6-stat	080207-eho-03-D8A6-stat	080207-eho-04-D8A6-stat	080207-eho-05-D8A6-stat	080207-eho-06-D8A6-stat
Cyclohexanol	C00854	ID0047	1436.06	1222.68	1548	1147.36	1632.39	1124.91	488.765	504.182	355.539	529.775	534.569	780.997	0	0	0	0	0	0	0	0	0	0	0	0
Dicyclohexyl	-	ID0053	0	0	0	0	0	0	0	0	0	0	0	0	0	0	0	0	0	0	0	0	0	0	0	0
Dodecanol	C02277	ID0057	1622.46	2208.44	5492.49	2743.17	4073.69	3123.89	6854.22	4505.27	8742.36	8572.01	7503.02	6641.95	2610.46	2125.48	2028.62	3907.24	1887.37	2181.71	5580.05	5034.76	4843.48	4923.57	6499.56	5787.32
Phosphoric acid	C00009	ID0145	1.80543e+06	1.95192e+06	1.91887e+06	2.03386e+06	2.09642e+06	2.05869e+06	2.1679e+06	3.32697e+06	2.50093e+06	1.85059e+06	1.57621e+06	2.41116e+06	1.98512e+06	2.29784e+06	2.45339e+06	2.56291e+06	2.30792e+06	2.44586e+06	1.10106e+06	1.49623e+06	1.22073e+06	2.32425e+06	1.272e+06	1.5637e+06
1,6-Anhydro-beta-D-glucose	-	ID0002	359.509	404.738	474.915	218.381	453.679	388.028	560.113	220.891	780.92	444.501	492.953	1033.16	11006	10304.6	10005.3	9775	12065.8	11026.6	10717.7	8918.56	6013.7	4599.44	6477.87	4924.83
1-Monooleoylglycerol	-	ID0005	2506.95	3402.49	13109.9	1690.65	30900.2	7207.16	481.499	290.515	1028.98	826.252	718.089	1373.42	3627.48	2610.66	2223.53	1919.03	2366.83	3108.72	6614.94	3034.37	8626.84	4599.5	1162.71	13254.1
1-Monopalmitoylglycerol	-	ID0006	4649.88	6014.47	22273	3150.15	53640.5	15419.6	1943.64	1282.15	2989.55	2805.62	2300.07	3777.24	11790.1	7378.8	6270.95	5912.64	6175.28	8488.65	27016.8	12054.6	37284.9	21770.1	5286.24	49389.6
1-Monostearoylglycerol	-	ID0007	335.204	564.335	782.193	340	2674.35	752.776	805.736	291.48	672.087	432.872	454.728	494.774	0	0	0	0	0	0	0	0	0	0	0	0
1-Pyrroline-3-hydroxy-5-carboxylic acid	C04281	ID0222	8955.56	14481.8	19659.4	13188.3	25123	18312.9	17160.4	15165.8	16762.5	23546.6	24009.8	21094.1	33407	42795.9	29344.6	32038.2	30371.8	35231.3	54743.5	66026.5	41460.2	44219.7	46064	58196.8
2-Aminoadipic acid	C00956	ID0281	0	0	0	0	0	0	0	0	0	0	0	0	785.554	937.044	836.984	725.483	959.945	1012.01	3874.64	1443.72	1033.65	610.212	1638.92	877.822
2-Aminobenzoic acid	C00108	ID0184	0	0	0	0	0	0	0	0	0	0	0	0	965.28	1172.62	1162.71	1358.45	880.686	996.216	0	0	0	0	0	0
2'-Deoxyguanosine 5'-phosphoric acid	C00362	ID0223	0	0	0	0	0	0	0	0	0	0	0	0	0	0	0	0	0	0	0	0	0	0	0	0
2-Deoxyribose-5-phosphoric acid	C00673	ID0012	0	0	0	0	0	0	0	0	0	0	0	0	173.262	209.588	137.387	150.63	260.661	265.266	410.609	347.487	237.438	235.648	315.698	446.466
2-Hydroxyglutaric acid	C03196/C02911/C02630/C01087	ID0014	3533.3	3811.19	5053.53	5823.13	2840.54	2064.99	10889.5	6326.62	6077.14	5736.14	5238.79	4677.99	700.568	1163.76	1340.98	1580.23	2040.76	1663.21	1764.86	3616.85	3398.38	2248.37	2749.17	3035.36
2-Ketoglutaric acid	C00026	ID0035	1424.56	2438.04	2379.09	2239.74	2564	3367.59	8858.2	3967.98	5455.2	4211.16	4591.03	3433.43	4482.52	4010.77	4700.07	4356.95	4886.06	5011.04	7544	10104.2	14994.1	9691.87	16344.4	15888.3
2-Monooleoylglycerol	-	ID0016	96.5752	78.3781	370.19	81.1676	1113.3	242.182	44.7017	43.6591	94.3572	86.7764	53.6831	111.376	117.564	80.069	100.142	70.3474	43.0043	79.6017	268.233	128.9	485.047	291.643	88.6103	716.681
2-Oxobutanoic acid	C00109	ID0237	8612.63	11360.5	15095	17872.8	11626.7	10092	1285.27	704.008	968.603	853.268	831.847	975.747	14167.3	14070	16970	24757.1	14639.1	23705.6	1140.32	1394.84	1157.82	1054.03	1538.58	1379.9
2-Phosphoglyceric acid	C00631	ID0017	1095.26	1483.67	2118.96	1751.6	2242.52	2187.75	2847.55	570.203	1919.51	2016.18	2284.51	1889.64	2258.99	2822.76	2285.78	2743.69	2493.11	2545.57	1360.27	1413.16	1455.24	1002.74	1580.19	1929.46
3-Hydroxybutyric acid	C01089/C03197	ID0021	1591.83	1675.69	1809.58	2221.16	2415.18	2490.9	742.937	323.321	812.558	1143.28	787.595	684.566	3214.26	4484.37	4348.1	4416.32	4250.58	4257.88	2021.67	2724.05	1302.51	1597.36	1969.83	1584.03
3-Phosphoglyceric acid	C00197/C00597	ID0023	6417.11	9104.43	12390.4	9860.3	13416.1	11126.5	17916.8	3914.25	12104.8	14682.3	15539.8	11541	9238.36	10206	9598.1	12046.5	12212.6	12135.4	7255.02	5875.07	5927.05	3957.61	5854.97	6378.04
4-Aminobenzoic acid	C00568	ID0209	2896.09	4992.13	5517.89	4294.77	8064.92	7390.47	6377.86	6024.03	6418.03	7381.85	8051.75	6881.97	8646.75	8353.74	8876.28	8688.06	9220.13	9519.29	12672.2	16353.9	6863.04	10560.2	11405.5	13105.7
4-Aminobutanoic acid	C00334	ID0228	1825.56	3258.57	2704.33	2346.46	2284.95	3790.69	10109.1	5701.41	6660.45	6346.89	7116.63	5615.56	3966.89	4868.87	4654.22	4319.76	4249.89	4309.8	3429.17	4606.69	2056.86	2653.29	4588.77	4326.33
5-Aminolevulinic acid	C00430	ID0025	161.011	244.372	127.613	232.05	260.646	290.184	1343.46	540.617	423.68	690.553	820.893	561.849	0	0	0	0	0	0	0	0	0	0	0	0
5-Aminopentanoic acid	C00431	ID0282	1338.63	430.012	2832.53	138.097	371.685	550.387	197.789	219.158	198.2	174.446	382.776	119.267	4564.65	3843.24	2862.55	2359.85	3354.83	3905.87	2730.92	2230.92	234.061	408.781	606.312	329.885
5'-Methylthioadenosine	C00170	ID0026	4019.74	3991.87	5130.67	5069.49	5591.79	20737.5	28129.6	11382.6	18924.3	21940.6	26310.2	18553.7	49997.7	54883.2	45480.1	52255.4	58789	60562.4	60253.7	41172.1	38976.2	35927.6	53338.6	49994.1
5-Oxoproline	C01879/C02237/C02238	ID0027	32215.7	52444.7	58945.9	43955.7	68737.9	44460.3	87097.6	82513.7	83881.2	104295	102612	79384.3	45212.4	55128	40592.3	43240	42728.4	47127.1	75474.7	105087	68380.7	72746.9	74494.1	90524.6
6-Phosphogluconic acid	C00345	ID0028	98.4115	145.523	177.115	219.694	182.928	387.72	451.766	349.413	713.916	572.301	567.129	667.404	0	0	0	0	0	0	0	0	0	0	0	0
Adenine	C00147	ID0030	8692.49	10655.7	12650.2	10890.7	14311.9	16586.1	69211	39802.3	54452.9	47376.2	50481.4	66590.8	23063.2	21361.5	21085.2	21370.6	25622.8	24986.6	50249	46010.1	25413.1	29815.5	46492.7	40743.1
Adenosine	C00212/C11501	ID0031	63509.7	93806.2	74362.5	54637.6	189570	33882.4	155584	388279	218041	289911	253533	138118	27598.2	17538.9	17377	18621.3	25663.6	24546.8	158922	426503	152517	252101	199129	302963
Adenosine-5'-monophosphoric acid	C00020	ID0032	131743	120218	122966	124040	48326.7	502958	698642	73843	295002	410264	560113	380986	887426	1.05209e+06	984768	1.09483e+06	1.21194e+06	1.24442e+06	569633	509983	684664	508908	1.05136e+06	1.04067e+06
Adipic acid	C06104	ID0033	5095.82	2784.55	2293.71	1956.38	1809.37	2033.7	2993.2	1945.33	2133.11	2423.15	2343.91	1918.58	0	0	0	0	0	0	0	0	0	0	0	0
Alanine	C00041/C00133/C01401/C05726	ID0034	83854.7	123516	140732	148125	126897	85910.6	179910	106560	87372.6	114973	107269	86254.1	79965	81849.7	93774.8	129118	88335	129312	157221	155745	82020.7	57883.3	131115	124260
Arabinose	C00216/C00259/C02479/C02604/C11476	ID0036	288.594	389.714	406.298	376.9	345.608	729.068	681.887	409.441	535.284	681.252	586.76	406.185	1974.91	2051.9	1803.58	1691.51	1899.04	2031.86	303.606	775.71	528.103	398.633	785.006	380.5
Aspartic acid	C00049/C00402	ID0038	150094	246903	245080	219836	255773	314264	635273	284034	307058	370733	389757	331777	386337	351022	291419	299525	349701	390683	281576	269063	238319	165743	268464	259953
Benzoic acid	C00180/C03096	ID0039	31308	31995	30631.7	32937.9	32629.2	27450.4	7788.38	3961.41	9886.66	16364.4	8282.76	9513.93	27728.5	29238.1	28733.2	27052.5	31219.8	27686	48504.8	8059.74	7992.85	6783.23	14422.8	7993.4
beta-Alanine	C00099	ID0040	6996.04	10972.5	11265.5	10344	9339.32	18610.6	40999.7	26931.2	29516.6	30253.3	33426.9	28232.6	31301.2	23733.2	21910.6	16821.1	18929.3	23397.4	19915.7	23945.1	41626.2	34931.5	42277.9	44364
Cadaverine	C01672	ID0041	39.8295	123.383	91.6676	68.8533	63.4116	3159.46	121.074	73.6626	154.751	89.7415	121.551	104.544	7906.58	9428.97	6689.74	6989.99	8129.24	7617.38	10339.8	13329.9	425.948	1053.57	229.67	792.645
Cellobiose	C00185/C06421/C06422	ID0241	111.802	177.597	232.863	173.977	349.821	1566.58	2876.39	785.869	1441.91	1588.32	1958.19	1729.13	9757.61	10823.3	10986.6	12662.6	12378.2	12091.6	14101.1	14052.5	6615.07	11815.9	15041.8	17080.7
Citric acid	C00158	ID0045	16351	14863.3	12633.3	12841.2	11161.4	13424.6	39685.7	18360.1	25405	23247.7	23357.4	18459.5	3655.85	4342.95	6018.59	6430.49	7026.31	9233.81	24890.1	6716.14	7787.13	5477.3	7597.09	7280.19
Cycloleucine	-	ID0048	0	0	0	0	0	0	0	0	0	0	0	0	1248.01	1328.8	1347.52	1481.45	1710.75	1548.41	6698.85	3487.6	11603.7	2501.08	6657.36	8086.48
Cysteine	C00097/C00736/C00793	ID0050	716.642	1170.09	1217.95	1089.05	1152.93	2706.26	4543.83	1986.19	2228.44	2866.77	2924.83	2537.43	3285.13	3351.69	4025.03	4004.82	6163.15	5573.81	6681.96	7269.67	7562.1	4162.57	9693.65	9668.94
Cytosin	C00380	ID0051	13238	15284.3	19096.3	15639.1	30265.1	10492.4	15272.4	21617.8	23952.2	21223.1	16092.3	23780.1	7715.97	7320.39	7704.97	7635.14	8543.68	8099.09	23136.7	30300.4	13295.4	25599.2	10560.5	18830.8
Diethylene glycol	C14689	ID0054	35797.8	35444.5	37405.3	41727.8	38088.5	31567.2	2525.56	1786.08	1421.39	2901.43	2734.46	1707.77	35021.7	44646.2	34578.6	27764.6	30948.6	32922.2	3793.05	2702.1	2133.23	2207.5	4166.73	3161.43
Dihydroxyacetone	C00184	ID0055	317.674	503.759	384.602	139.826	962.586	363.359	210.729	819.27	270.847	484.162	504.854	29.5153	485.517	433.397	268.144	364.295	262.063	280.423	7867.69	1630.42	159.512	858.698	1399.78	1202.95
Dodecanoic acid	C02679	ID8028	32874.5	41336.6	30496.9	22804	41992.7	24119.2	15977.7	12683.7	29259.5	19452.8	14082.2	30316.2	22867	20890	18312.9	23438.5	24532.2	20398.7	38797.2	44542.1	38665.7	31933.3	25051.3	54211.2
Erythritol	C00503	ID0059	1372.38	1120	1138.15	1184.47	780.478	1510.79	4115.59	2421.53	2937.32	3528.6	3309.33	2707.47	1885.33	2361.46	1836.11	2287.7	2076.56	2331.67	3404.01	3957.25	3716.75	3153.55	4937.33	3691.42
Erythrose-4-phosphoric acid	C00279	ID0060	56.0878	121.551	132.163	127.957	328.478	56.7471	377.741	252.949	255.251	394.969	346.656	511.881	0	0	0	0	0	0	0	0	0	0	0	0
Ethanolamine	C00189	ID0250	38628.9	52762.4	58003.2	57304.2	64522.7	119312	112813	95042.7	110434	74719.4	80012.6	93099	199506	226755	219532	215197	270044	236690	214735	366898	184064	174922	318882	309346
Fructose	C00095/C01496/C01719/C02336/C05003/C10906	ID0061	3999.29	5293.4	3994.51	4994.45	2521.16	2982.75	2669.61	1914.38	1382.55	3692.6	2291.97	1586.06	1638.69	2314.92	2195.63	2094.37	1958.66	1871.02	728.838	732.998	1251.24	989.029	1849.58	1625.75
Fructose-6-phosphoric acid	C00085/C05345	ID0063	1461.55	2190.63	2371.16	2412.51	3087.8	3613.91	12573.7	6218.98	7808.59	11643.1	13183.9	10578.5	5356.13	4955.32	4388.44	4569.1	5142.52	5252.72	1901.98	2589.45	6019.58	4584.43	8379.71	8555.64
Fucose	C00382/C01018/C01019/C02095	ID0064	0	0	0	0	0	0	0	0	0	0	0	0	694.863	760.555	674.133	716.437	743.659	622.317	277.501	453.781	251.358	179.518	463.157	302.91
Fumaric acid	C00122	ID0065	4262.61	6060.43	5481.34	5450.92	7143.39	10899.3	17017.2	9514.95	8613.69	9713.24	10240.2	8293.06	15479.1	14818.3	13885	14444.3	13615.9	13995.5	8021.97	10755.7	7277.96	5972.5	8014.08	8664.94
Galactosamine	C02262	ID0066	0	0	0	0	0	0	0	0	0	0	0	0	1432.71	1694.91	1298.15	1225.97	1892.27	1826	5021.1	2672.52	1836.95	1043.48	2930.62	2088.12
Galactose	C01825/C01582/C00984/C00962/C00124	ID0284	364780	425176	306836	544821	193166	295017	280890	342082	339767	482702	292844	252822	601833	990509	955526	1.17123e+06	736444	817957	67608	34231.1	273388	91739	132787	68895.2
Glucono lactone	C00198	ID0069	4292.83	5034.4	4441.06	7075.18	3589.36	7526.61	34283.7	35114.3	40698.3	49083.7	33457.4	29017.5	520227	814278	787265	932013	627232	686545	106859	77057.5	245083	90537.9	127114	75097.4
Glucosamine	C00329/C01811/C08349	ID0071	1261.43	1491.06	1932.99	1913.18	1278.16	2638.44	10157.5	3607.1	5158.28	5275.09	6951.7	5319.4	6490.41	7786.07	7165.31	7866.42	7275.01	7817.94	3365	3135.04	6228.39	4016.49	10159.7	7728.66
Glucosamine-6-phosphoric acid	C00352	ID0072	1357.08	778.785	536.385	1641.98	263.648	3720.33	12513.8	4384.51	6891.99	8057.95	13677.7	12750	6094.34	5692.44	5045.73	5938.02	5925.04	5928.08	532.979	890.707	656.226	465.11	1594.55	966.735
Glucose	C00031/C00221/C00267/C00293	ID0073	565649	803693	413613	815871	543581	497368	349553	453612	553080	717486	400578	588310	171539	227562	404237	700713	223837	274762	124264	100961	84200.1	82757.5	82381.8	111069
Glucose-1-phosphoric acid	C00103/C00663/C11450	ID0244	2010.14	2383.82	2794.1	2159.48	2748.74	3732.5	7010.28	2811.85	3775.52	4833.44	5658.94	4355.25	4371.53	3465.11	2988.38	3214.05	3773.72	3725.23	6611.41	4361.2	3899.32	2997.63	4499.69	4668.62
Glucose-6-phosphoric acid	C00092/C00668/C01172	ID0074	19494.9	26309.6	30973.2	27281.6	31440.9	91825.6	140854	75773.6	98187.5	106234	128096	98028.5	153634	159882	132394	136922	168956	178453	75628.8	101731	424885	317418	535970	511055
Glutamic acid	C00025/C00217/C00302	ID0075	1.34999e+06	1.78663e+06	1.65346e+06	1.57362e+06	1.70634e+06	1.87575e+06	3.34458e+06	2.2073e+06	2.02721e+06	1.81594e+06	1.93812e+06	2.08854e+06	2.00757e+06	1.84182e+06	1.719e+06	1.64378e+06	1.66577e+06	1.83262e+06	3.28466e+06	2.60178e+06	1.67824e+06	1.70914e+06	1.94448e+06	1.74196e+06
Glutamine	C00064/C00303/C00819	ID0077	2540.21	4501.32	5086.27	5769.06	1956.35	13254.8	105426	12598.6	30967.8	44261.2	72067.6	47274	25805.5	25719.3	19882.2	20848.8	20034.1	25833.9	705.276	414.758	855.059	286.757	8270.44	338.061
Glutaric acid	C00489	ID0078	2322	1664.78	1378.97	1283.19	1027.29	1862.97	1057.41	1128.81	954.691	955.418	1021.24	890.298	1876.16	1872.94	2065.01	1798.82	2004.44	1906.63	2508.03	2552.96	1792.02	1794.15	2298.64	2606.08
Glyceraldehyde	C00577/C02154/C02426	ID0079	367.315	680.503	543.377	561.268	521.328	2778.53	7206.58	3483.91	3597.27	4746.25	6332.23	4176.13	6154.13	5021.71	4380.51	4147.92	5259.83	5446.97	10545.3	10770.4	6347.03	5660.36	7533.43	8198.53
Glyceric acid	C00258	ID0080	3218.71	4463.8	3634.84	3435.3	8611.01	4692.98	2633.52	5658.11	4040.2	3876.99	3335.3	1628.71	6295.47	5012.5	6657.45	7526.59	6230.08	6512.63	15097.6	19961.1	4937.15	13917.5	15162	18190.6
Glycerol	C00116	ID0083	18967.1	19000.8	17545.7	20532.3	22630.9	16120	27208.2	13084.7	19888.8	24529.7	16476.1	16090.6	11594.2	15277.9	19678.5	12798.7	24934.6	22106	21767.1	29537	16750.6	15423.9	22770.6	28696.8
Glycerol-3-phosphoric acid	C00093/C03189	ID0082	41444.4	63586	89258.5	63503.9	109974	137512	107153	68599	82206	84422.3	85968.5	91435.2	179431	196182	195106	200056	234789	237317	140919	124102	180457	145336	168806	227134
Glycerone phosphoric acid	C00111	ID0084	0	0	0	0	0	0	2005.46	1661.18	1873.11	2537.43	2538.28	1905.01	1422.72	1148.11	1041.1	1118.33	972.061	1113.76	880.863	2117.37	2637.72	1788.84	2923.74	2885.18
Glycine	C00037	ID0085	6293.98	9198.52	9503.7	8524.17	9330.72	9892.23	29123.8	19470.8	16208.8	20764.6	21085.1	17609.1	11110.2	12774.6	11966.1	11543.2	13805.6	14103.8	16730.5	17587	10004.3	9608.64	11743.1	14056.7
Glycolic acid	C00160	ID0086	818.646	952.983	1289.62	1191.34	1101.55	1692.37	857.768	678.679	480.498	752.782	672.654	471.558	2371.36	2711.27	2854.78	2391.31	5354.84	4071.82	721.336	627.921	462.066	483.081	730.534	558.187
Hexadecanoic acid	C00249	ID8034	89449.2	95124.2	224628	78353.4	419878	212398	51476.7	29868.8	64923.4	56625.6	52907.9	78894.8	181041	150130	127636	116270	121519	147141	372608	158182	422246	338170	120336	541378
Hexadecanol	C00823	ID0093	1011.56	1442.52	1676.1	1368.75	1548.32	866.028	7432.66	2620.6	3664.17	4195.02	5160.51	3680.06	864.173	379.509	269.351	753.617	398.998	479.94	1051.08	859.828	1102.46	1049.53	1203.14	939.696
Homoserine	C00263	ID0096	1194.07	2283.15	2449.37	2368.87	3853.62	7574.48	10998	6680.12	6683.13	9566.86	9397.1	7082.81	13047.5	13912.8	10475.5	10603.7	11989.9	12981.5	5908.22	3880.25	3507.42	3752.07	4997.16	4384.77
Hydrogen sulfide	C00283	ID0201	0	0	0	0	0	0	0	0	0	0	0	0	229.518	649.966	682.622	817.436	1132.06	1265.58	1208.98	480.719	351.159	143.833	92.2087	100.669
Hydroxylamine	C00192	ID0097	16195.5	18490.2	18687.2	20969.8	19285.6	17388.3	17349.7	12291.3	26302.4	25269.1	22061	24625.4	14674.4	15718.5	14622.6	16105.8	15112.4	14707.8	11025.6	15418.6	19919.1	17025.6	21125	20296.6
Hypoxanthine	C00262	ID0098	452.193	886.682	942.043	1277.48	1086.34	33334.4	21444.1	15624.3	16603.2	17392.7	21148.4	17123.2	58338	68948.6	39161.4	41236.8	66816	76504.5	6466.16	6366.38	16254.8	12633	21108.5	16729.3
Inosine	C00294	ID0212	826.604	1106.23	740.275	1954.81	1718.06	685.324	786.112	1101.3	1100.23	1598.18	1092.41	986.74	533.556	81.8179	327.464	160.773	399.72	528.771	663.749	920.466	524.207	1049.83	1107.03	1086.28
Isoleucine	C00407/C06418	ID0101	35493.3	44907.3	55143.7	51796	53285.2	48647.5	203269	117605	126914	142734	144037	124387	46189.2	45048	39754	36619.1	47799.8	51127.9	95951.6	102655	116623	83586.6	117801	117644
Isomaltose	C00252	ID0102	0	0	0	0	0	0	4315.29	1079.35	2190.37	1965.46	2651.41	2700.82	68334.1	57218.2	57026	57815.6	74265.8	68237.5	11070.7	4107.94	23750.2	4712.31	9312.55	7888.73
Lactic acid	C00186/C00256/C01432	ID0103	213573	205268	238285	267180	220080	137667	596483	413983	404189	686498	486865	376962	82545.8	103572	114765	62863.1	86107.9	90711.5	86332.4	80607.7	89962.4	79527.7	97302.1	88041.6
Lactose	C00243/C01970	ID0104	3107.44	3997.93	4919.37	3341.84	6004.52	7222.81	1968.93	1879.19	1953.4	3452.02	2183.54	1758.15	7723.34	7446.39	7182.4	8994.22	8612.96	7636.3	6665.15	6301.36	6456.38	3541.5	3490.43	8852.97
Leucine	C00123/C01570	ID0107	46716.1	51375.6	58306.6	53103.1	60304.6	62813.1	288230	211559	204720	242423	231616	196078	69546.3	60595.6	57012.6	57075.2	69879.8	71007.5	189416	166239	226866	112992	186874	199657
Lysine	C00047/C00739	ID0108	100596	138340	169277	167400	170048	814941	497466	275401	335313	358978	387770	325445	1.32547e+06	1.33351e+06	1.10043e+06	1.09436e+06	1.35144e+06	1.36417e+06	1.70744e+06	1.86338e+06	541697	572341	552326	659619
Lyxose	C00476/C01508/C02204	ID0109	5332.44	8181.34	9062.21	8370.01	9007.55	40858.4	16444.3	11634.9	12304.8	14354.8	15994.3	14868.9	68495.6	74964.2	72512.1	80613.6	78030.6	75810.5	136192	162482	54770	98505.4	125487	127381
Malic acid	C00149/C00497/C00711	ID0111	2181.12	3054.94	3150.59	3058.9	4541.28	3647.37	12036.1	6065.03	5367.98	7240.52	7516.81	5864.49	4148.87	3796.52	3274.5	3375.01	3026.51	3287.78	2907.91	3634.06	3227.7	2518.53	3576.96	3680.05
Malonic acid	C00383	ID0114	0	0	0	0	0	0	0	0	0	0	0	0	958.559	1207.51	1241.53	1328.04	876.446	962.394	357.296	246.314	227.695	468.558	155.861	1132.91
Maltose	C00208/C00897/C01971	ID0115	1779.73	3018.31	3791.42	3673.06	4843.2	3892.43	2391.16	2310.11	2937.71	4743.65	3357.27	2836.96	2914.28	3083.75	8353.61	4012.54	3539.89	3330.01	4406.55	4473.06	3924.46	3162.86	7376.16	6557.75
Maltotriose	C01835	ID0116	0	0	0	0	0	0	0	0	0	0	0	0	426.683	829.048	552.857	1189.15	639.878	893.897	1955.61	1669.78	806.713	2225.49	3506.28	2353.25
Mannitol	C00392	ID0117	13511.7	17220.7	18403.2	15825.8	17529.7	19516.6	24713.3	21374.6	16591.6	22664.1	22859.6	15859.1	916.614	888.05	701.698	556.765	1001.75	882.585	1342.73	955.069	2415.2	2114.83	3656.5	3621.93
Mannose	C00159/C00936/C02209	ID0118	2.31935e+06	2.42819e+06	2.08291e+06	2.7317e+06	1.7732e+06	2.09681e+06	1.81443e+06	2.52161e+06	2.01183e+06	2.40087e+06	1.95973e+06	1.89518e+06	1.09703e+06	1.71273e+06	1.7154e+06	2.07446e+06	1.34975e+06	1.46627e+06	323192	244773	492432	190757	260062	159603
Mannose-6-phosphoric acid	C00275	ID0213	21688.9	28611.9	34624.2	29812.3	33259.5	101379	157473	84973.5	108367	116965	140313	105723	170384	177620	147152	147141	187382	197977	74235.9	105869	487454	366404	609671	574052
Melibiose	C05402	ID0289	1665.1	2177.83	2477.12	2220.05	2867.23	3852.89	2269.07	2167.41	2566.64	3366.13	2414.78	2072.54	2002.46	2097.12	1818.22	2769.35	2438.42	2083.34	2262.14	3248.28	4175.91	1516.96	1431.86	4485.19
Methionine	C00073/C00855/C01733	ID0119	4198.01	5119.08	7409.39	8035.63	6125.11	10277.8	7059.68	3281.79	4707.1	5618.9	5155.85	4909.29	15654.8	14379.4	14173	15433.8	17798.5	17998.2	53172.1	45937.8	10793.6	7597.43	9084.08	12077.6
N-Acetylglucosamine	C00140/C03878	ID0122	856.027	851.969	808.625	921.738	1086.61	703.985	3893.36	2302.49	2194.64	2755.56	2681.89	2105.11	0	0	0	0	0	0	0	0	0	0	0	0
N-Acetyl-glutamic acid	C00624	ID0123	5887.35	10696.3	12848.3	9791.73	16152.2	22391.2	72574.5	16513.1	29076.2	43801.9	50526.1	36176.8	26693.8	28454	21477.1	22438.9	26457.9	28679.8	9736.88	11825.9	28641.3	16791	30286.7	30566.2
N-Acetylmannosamine	C00645	ID0214	309.418	449.307	454.967	1025.07	404.863	524.841	509.033	530.442	622.13	1088.8	545.92	652.225	0	0	0	0	0	0	0	0	0	0	0	0
Nicotinamide	C00153	ID0127	40310.3	59020	69711.7	59095.9	99104.3	146925	171296	84593.8	115432	118638	136841	113319	229804	256525	239891	268329	276674	260854	327832	327165	247844	246833	240473	355905
Nicotinic acid	C00253	ID0216	1924.56	2265.61	2688.73	1946.75	3393.96	6590.35	2723.72	2858.04	3065.58	2699.03	2514.4	2237.82	10207.6	10530.6	9426.26	9412.7	10922.7	10655.2	28544.5	34349.5	8977.85	10930.1	11555.5	13153.8
Norleucine	C01933	ID0129	0	0	0	0	0	0	0	0	0	0	0	0	107.538	133.292	88.6257	69.0917	101.085	112.282	729.014	975.885	1812.22	772.909	2767.86	2401.02
Norvaline	C01799/C01826	ID0130	0	0	0	0	0	0	0	0	0	0	0	0	442.857	431.413	322.732	328.638	392.524	428.567	309.826	1411.53	4001.61	2075.47	4438.67	4268.74
Octadecanoic acid	C01530	ID8038	28227.2	32714.3	39247.4	37506.5	56338.7	37056.7	27863.9	13679	31876.7	31442.2	30380.4	31297.1	37126.5	38202.8	32876.2	35336	37662	36020.2	26970.7	23640.8	31346	27435.9	28268	32801.6
Octadecanol	-	ID0133	1839.6	2123.65	3046.51	2046.91	4870.92	2457.41	2084.72	1434.9	2035.03	1858.91	1803.29	1525	2326.73	2306.5	1777.49	2124.79	1979.39	2110.94	1492.62	1247.4	1588.99	1463.84	1417.54	1826.33
Oleic acid amide	-	ID0135	4215.14	4359.7	15979.6	1950.2	26007.5	4491.65	1202.18	803.905	1565.97	1761.96	1479.05	1453.85	0	0	0	0	0	0	0	0	0	0	0	0
Ornithine	C00077/C00515/C01602	ID0136	2280.32	3155.07	3166.6	2936.69	3047.99	19945.5	16692	20476.2	14863.4	20069.4	15090.3	15689.8	26913.3	34076.2	30283.2	31260.7	50407.3	42092.1	140359	229407	76140.7	117630	112284	166016
Orotic acid	C00295	ID0137	347.965	295.991	380.418	486.591	324.202	304.992	2487.31	1446.24	2240.41	2007.12	1800.83	1745.35	202.835	270.445	211.972	224.385	103.358	205.732	120.695	165.634	111.348	69.2569	182.064	154.691
Oxalic acid	C00209	ID0138	0	0	0	0	0	0	0	0	0	0	0	0	105.818	198.365	177.488	149.192	151.116	133.884	0	0	0	0	0	0
Palatinose	C01742	ID0291	655.908	905.985	1194.35	1147.41	1485.71	1210.06	709.804	632.45	1029.5	1112.86	838.883	1050.85	4367.33	4708.31	5929.21	5446.79	5555.96	5544.44	8989.37	9146.74	4208.61	6833.1	8698.26	10308
Palmitic acid amide	-	ID0140	6464.08	5608.75	18322.8	3324.14	28113.5	11506.5	1510.79	1270.21	2138.43	1595.9	1532.33	2460.43	11009.4	6640.99	5887.12	5645.66	6983.75	8609.8	18503.5	6816.19	20889.9	14289	5741	23160.7
Pantothenic acid	C00864	ID0204	0	0	0	0	0	0	0	0	0	0	0	0	2137.84	2275.33	1852.57	1863.7	2064.99	2373.31	389.712	851.561	906.914	758.342	994.784	913.653
Phenylalanine	C00079/C02057/C02265	ID0142	45929.1	55938.2	63035.7	59750	76567.5	55248.2	77023.9	61444.5	72391.8	68982.8	79220.1	66131.4	43749.8	51231.3	47476.5	49636	63669.8	59580.3	84389.3	83299.3	36278.6	36001.5	54322.7	58147.8
Phosphoenolpyruvic acid	C00074	ID0144	2443.63	4124.66	6573.62	4715.19	6729.89	5707.61	6386.2	741.212	3341.27	3993.15	4737.83	3859.19	6163.57	5812.45	4798.98	7099.67	4227.88	5107.47	4804.86	3430.27	4429.15	2277.24	4111.64	4262.91
Phosphoethanolamine	C00346	ID0205	23126.2	32374.7	42762.6	40734.8	55682.3	54815.1	26936.2	16581	28858.9	25568.4	25472.5	29977.6	60074.7	84880.1	63763.6	70677.4	62176.8	66953.5	28900.9	26601.8	51742.5	43638.3	36097.2	67014.2
Pipecolinic acid	C00408	ID0298	0	0	0	0	0	0	0	0	0	0	0	0	1281.85	1350.08	1347.52	1491.81	1690.13	1531.29	7003.18	2945.77	11603.7	3128.75	6657.36	8086.48
Proline	C00148/C00763	ID0147	37644.5	43541.5	56578.3	63862.3	54979.9	71701.6	123224	74016.8	121184	118860	111372	112954	84420	78625.1	68978	68108.3	95298	100360	100335	117691	80805.5	54318.1	84460.9	87735
Putrescine	C00134	ID0269	297075	398934	296070	414271	254023	264044	429182	377357	487158	498387	393274	447688	295762	332558	238062	239903	276253	261302	429372	589903	373414	358864	589840	418720
Pyrophosphoric acid	C00013	ID0148	7975.44	18893.5	24124	16190.3	22153.2	154319	93618.8	108.516	3402.41	3622.1	12320.1	11150	312537	282318	247734	300395	302489	301335	22604.9	6103.7	62391.4	1444.84	11648.7	18448.8
Pyrrole-2-carboxylic acid	C05942	ID0149	749.951	1237.57	1393.75	778.093	1919.21	885.611	1012.18	654.178	1038.73	1073.16	1062.01	1079.86	1140.98	876.573	676.092	653.725	728.254	741.417	1345.37	1824.86	805.953	1403.73	1435.82	1608.54
Pyruvic acid	C00022	ID0150	6031.58	9024.74	7294.47	7842.53	5371.41	20025.8	16632.8	12693.7	14608.9	12785	10093.6	8849.65	19506.9	30291.9	33489.1	41700.2	30803.6	32290.4	8459.38	15947.3	12146.5	10487.2	16650.9	15252.3
Quebrachitol	C08257	ID0151	165.729	128.799	281.212	124.852	592.518	271.866	168.345	100.779	107.671	263.153	162.103	107.782	0	0	0	0	0	0	0	0	0	0	0	0
Quinic acid	C00296	ID0152	0	0	0	0	0	0	0	0	0	0	0	0	1152.58	1160.11	989.579	988.668	1143.15	1143.69	869.579	589.895	924.652	748.561	1050.67	1164.52
Ribose	C00121/C08353	ID0155	935.541	1144.96	1519.74	1169.36	1333.58	1666.2	3678.28	2029.72	2682.16	2866.65	2947.89	2365.75	2611.1	2601.33	2497.2	2590.84	2588.57	2682.34	2731.29	3872.24	3325.57	2485.57	4233.1	3578.11
Ribose-5-phosphoric acid	C00117/C03736	ID0156	404.974	586.296	743.81	559.141	654.298	1273.4	8806.95	3785.29	6736.28	8712.14	9705.08	7503.96	2776.37	2265.51	2573.99	2677.82	2949.21	2988.16	12314.4	9769.16	12969.9	11651.3	5867.04	18180.2
Ribulose-5-phosphoric acid	C00199/C01101	ID0157	34.2409	69.7471	92.9903	54.9531	53.0434	88.0687	702.131	300.767	501.653	475.771	497.105	499.414	0	0	0	0	0	0	0	0	0	0	0	0
Serine	C00065/C00716/C00740	ID0159	53092.2	76657.8	93780.5	91805.2	93217	121908	160661	91460.8	91229.2	171226	128635	111214	151267	158171	150582	161685	150160	161042	101045	84302.4	120163	67234	116046	114026
Shikimic acid	C00493	ID0160	1928.17	1579.17	2405.42	2026.65	3418.4	1401.08	717.381	734.607	2024.26	1196.91	995.685	1406.74	0	0	0	0	0	0	0	0	0	0	0	0
Sorbitol	C00794	ID0218	3655.98	4579.99	4915.16	4224.11	4780.56	5195.57	6348.76	5274.63	4190.69	5764.98	5777.78	4181.77	5981.63	6125.53	4292.14	4269.87	5902.94	6120.07	7385.78	10153.3	3380.19	3340.62	4890.23	4791.47
Spermidine	C00315	ID0219	146708	260509	210612	216212	244969	150940	53620.9	44802.4	167428	100127	68646.4	143855	95506.6	59032.2	70459.9	76991.3	95303.3	79431.3	193530	145057	206291	123658	101627	210886
Succinic acid	C00042	ID0161	37427.9	35214.4	40105.5	39232.8	44831.6	47315.1	73963.6	43415.5	41714.5	51768.3	53831.5	45760.8	53248	61043.7	61150.9	64828.9	70366.4	68819.5	18855.6	31641	23656.1	19502	26731.3	29145.1
Succinic acid methylester	C00042	ID0161	1081.07	1247.81	1435.64	1149.68	1750.56	3707.04	2387.97	1498.85	1617.69	2167.76	2228.85	1718.03	6996.4	6965.73	6176.88	7002.27	5583.89	5747.22	3442.67	4451.68	3630.43	2959.48	4270.38	3888.35
Sucrose	C00089	ID0164	8472.49	11284.6	9819.99	8274.37	16599	20674.6	20003.4	23806.6	23552.9	45853.8	21190.6	13870.4	17095.5	20648.4	20719.1	24390	25261.2	22406.3	16050.5	14410.1	13074.6	13634.8	15251.9	20314.7
Tetradecanol	-	ID0166	5120.11	8894.39	3531.76	2386.29	19880.7	10727.5	4647.24	4932.55	5802.55	5506.83	5497.73	6926.68	4415.62	2125.14	1595.06	5920.38	2463.35	1904.64	4901.42	5190.63	3669.84	3565.4	4280.24	6335.5
Threonine	C00188/C00820	ID0167	13064.5	19894.8	23170.8	20661.9	23948.8	23807.7	101259	61784	55725.2	78086.2	73851.8	57784.6	24078	21420.7	19319.5	17834.4	22768	24888.5	53183.9	51040.5	65479.2	37873.9	57513.4	59199.4
Thymine	C00178	ID0168	56060.7	80966.7	79997.6	60713.3	134323	28925.8	12166.2	24938.6	28227.8	26960.5	18670.8	19190.5	10817.9	7845.31	9964.82	9855.67	11276.6	11557.7	14097.7	30898.6	31999.9	18481.9	11790.7	19784.6
Trehalose	C01083	ID0169	23645.4	34282.8	40627.7	31544.7	44920.9	90741.1	5788.68	2876.35	3299.5	4607.47	4893.16	4549.4	153089	148305	117292	125222	153422	152268	5308.48	4434.15	1934.95	1724.28	2739.24	3197.67
Triethanolamine	C06771	ID0173	353.618	319.209	584.744	302.606	378.453	364.277	385.021	237.614	447.737	6462.34	429.396	344.024	0	0	0	0	0	0	0	0	0	0	0	0
Tryptamine	C00398	ID0278	55.037	111.359	101.956	182.519	135.457	229.927	1176.29	433.445	376.929	484.814	781.455	483.021	0	0	0	0	0	0	0	0	0	0	0	0
Tryptophane	C00078/C00525/C00806	ID0174	1027.8	829.789	827.861	1556.14	645.816	1401.33	5825.37	2843.15	4766.32	5391.26	4633.73	4833.31	1468.52	1581.56	1512.91	1272.52	1717.07	1654.45	994.45	1007.91	823.848	755.236	1506.89	1493.75
Turanose	-	ID0294	0	0	0	0	0	0	0	0	0	0	0	0	2826.33	2846.16	2319.7	3152.66	3467.19	2736.73	1846.28	1756.74	1450.46	844.218	726.012	2436.69
Tyrosine	C00082/C01536/C06420	ID0175	48366.3	64849.4	81184.1	75863.4	85876.2	117993	260012	115311	165079	184723	222260	173807	132854	151822	116776	124488	184390	180861	1.2995e+06	1.3507e+06	191632	215288	235617	300469
Unknown#bth pae 001	-	ID0190	0	0	0	0	0	0	0	0	0	0	0	0	5890.22	5693.17	4388.26	5754.96	6782.68	6711.5	3579.26	3442.14	2089.01	1854.63	3310.55	4171.06
Unknown#bth pae 004	-	ID9208	0	0	0	0	0	0	0	0	0	0	0	0	0	0	0	0	0	0	0	0	0	0	0	0
Unknown#bth pae 008	-	ID9157	0	0	0	0	0	0	0	0	0	0	0	0	801.666	946.746	898.392	808.008	990.387	970.354	3000.6	3935.54	79.5372	950.083	1528.08	1561.18
Unknown#bth pae 009	-	ID9158	31179.4	30998	34952.5	40475.2	32445.7	21053.3	96688	76996.2	63549.6	109843	76754.1	59762.2	0	0	0	0	0	0	0	0	0	0	0	0
Unknown#bth pae 013	-	ID9162	5017.04	3708	3982.94	5860.57	2777.42	4155.38	8826.79	6534.39	9198.38	9233.58	8669.1	9218.18	3569.3	4216.1	6248.89	4751.74	3951.39	4181.62	6460.45	8751.33	6973.01	5849.15	8635.8	6558.94
Unknown#bth pae 014	-	ID9163	144.328	188.291	412.993	182.775	354.779	166.874	740.219	288.984	784.476	836.739	712.011	527.933	356.19	600.368	488.154	549.008	516.509	360.427	631.861	1258.85	601.127	530.734	977.035	676.619
Unknown#bth pae 015	-	ID9164	215.788	158.635	247.432	224.302	366.494	236.79	69.446	140.123	178.731	136.466	113.967	109.837	0	0	0	0	0	0	0	0	0	0	0	0
Unknown#bth pae 016	-	ID9165	0	0	0	0	0	0	0	0	0	0	0	0	112.485	120.669	92.9607	79.2136	110.087	82.9625	21.7528	80.1138	72.1814	53.6514	111.806	76.1569
Unknown#bth pae 017	-	ID9166	2856.91	7716.22	10268.4	6114.12	18730	38516.5	54921.8	21467	16382.5	31363.7	70536.3	20479	101327	120582	58712	56638.1	85256.3	100130	20952.7	18550.4	20474.1	29741.5	57105	47930.4
Unknown#bth pae 018	-	ID9167	891.379	984.19	1169.43	1086.28	1416.17	2506.96	2235.28	1859.28	2274.35	1546.73	1663.61	1874.49	0	0	0	0	0	0	0	0	0	0	0	0
Unknown#bth pae 019	-	ID9168	325.018	389.185	394.018	315.424	517.007	434.714	667.344	480.689	792.466	646.405	693.567	797.557	0	0	0	0	0	0	0	0	0	0	0	0
Unknown#bth pae 021	-	ID9170	1578.28	2161.72	2445.66	2546.56	3334.23	4016.08	21624.4	13829.3	14792.7	17518.1	20276.5	14633.5	5299.69	5873.52	5743.19	6372.43	5472.69	5000.38	5938.11	5458.84	5892.68	5408.36	8163	8288.78
Unknown#bth pae 022	-	ID9171	3839.09	4454.27	4521.34	2836.46	7323.81	1886.58	2276.76	4394.68	3776.54	4142.72	3140.42	2693.19	1055.23	823.46	824.443	787.136	853.351	952.927	5994.99	9750.28	4287.52	6083.87	4115.22	6571.75
Unknown#bth pae 024	-	ID9173	229.7	310.272	409.627	343.956	414.606	1340.38	3587.53	2528.98	2552.11	2618.76	4751.41	2260.43	1388.1	1793.24	1999.21	3255.43	1604.6	1935.69	666.651	902.745	626.304	689.118	1286.63	1355.13
Unknown#bth pae 025	-	ID9174	506.241	403.452	363.454	278.666	331.23	478.905	489.601	315.432	393.263	375.175	429.961	367.322	875.738	679.947	727.282	791.74	939.88	739.427	13.0681	1302.66	557.293	1426.65	1275.06	1439.34
Unknown#bth pae 027	-	ID9176	237.045	289.594	182.379	217.57	323.472	171.572	522.492	366.789	314.132	297.77	506.769	423.451	320.325	510.562	188.963	344.371	507.45	520.931	551.397	610.102	295.056	387.246	381.547	394.908
Unknown#bth pae 028	-	ID9177	0	0	0	0	0	0	0	0	0	0	0	0	128.181	129.952	218.522	123.544	166.358	135.089	33.8801	210.143	60.9056	86.6537	154.568	172.924
Unknown#bth pae 030	-	ID9179	19455.4	25539.4	26287.6	19142.4	50833	10320	8321.06	15041.9	19431.7	23607.3	17344	12070.7	3308.37	1375.51	2470.4	1936.95	2882.68	2455.59	28305.1	57665.9	8770.16	30063.3	16652.2	33143.7
Unknown#bth pae 035	-	ID9184	0	0	0	0	0	0	0	0	0	0	0	0	0	0	0	0	0	0	15.6173	180.446	166.162	114.114	131.607	146.312
Unknown#bth pae 036	-	ID9185	3662.24	3198.76	1974.66	3007.44	2722.19	887.179	1098.62	1125.76	2082.69	1906.29	1295.29	1793.2	0	0	0	0	0	0	0	0	0	0	0	0
Unknown#bth pae 038	-	ID9187	0	0	0	0	0	0	0	0	0	0	0	0	1316.59	1558.5	1086.28	1100.99	1352.19	1408.58	1073.31	641.543	373.462	615.606	724.634	776.329
Unknown#bth pae 039	-	ID9188	14558.8	19196.6	21523.6	21421.9	18818.5	106007	119812	57778.8	70652.6	71266.1	87436.2	88506.8	191515	211523	223826	253678	243045	239965	572071	635189	186136	357776	586136	536849
Unknown#bth pae 042	-	ID9191	0	0	0	0	0	0	0	0	0	0	0	0	1479.81	1271.07	1112.89	965.23	1038.49	1197.91	3057.06	2170.23	1905.09	1098.42	1918.4	1753.76
Unknown#bth pae 044	-	ID9193	979.571	1185.76	3194.77	807.274	4495.42	3805.67	351.111	247.555	320.084	226.413	321.943	490.421	4547.3	3765.01	3654.92	3485.43	3566.46	4408.53	5626.78	2394.88	5870.55	3531.43	2161.47	6586.02
Unknown#bth pae 051	-	ID9200	232.922	313.962	333.232	342.211	353.476	251.85	556.997	282.793	380.718	464.396	458.375	376.542	361.674	397.189	272.775	308.283	443.295	368.49	318.629	374.652	210.869	143.506	337.942	359.304
Unknown#bth pae 056	-	ID9205	13038.4	14484.7	16240.3	15836.5	17671.1	34463.3	44892	35613.5	31197.3	33072.8	34629	33032.7	49771.3	60294.2	56056.5	65451.3	65679.2	61489	49305.4	54673.2	34974.2	36268.8	48451.2	48555.6
Unknown#bth pae 058	-	ID9207	4017.45	5090.22	4834.16	6589.97	3897.39	7090.93	23443.7	21203.5	25304.7	30756	22235.6	19651.3	6788.77	8326.82	7863.44	7840.45	7744.4	8214.5	5607.51	4010.64	4642	2566.06	4426.19	4050.83
Unknown#bth pae 059	-	ID0189	0	0	0	0	0	0	0	0	0	0	0	0	203.28	501.063	325.609	358.782	272.384	383.362	659.075	696.999	455.183	460.221	653.078	827.543
Unknown#bth pae 061	-	ID0193	0	0	0	0	0	0	0	0	0	0	0	0	742.815	692.771	799.036	785.693	899.172	601.339	2343.3	3486.6	1193.94	1795.41	1768.85	2497.39
Unknown#bth pae 062	-	ID8046	22610.3	29083.9	27029.3	22809.8	36051.6	20755.3	15800.6	14454.8	21251.5	16030.8	13651.6	20249	18381.9	20749.6	19872.5	22058.5	21019.9	19255	32343	37693.4	17284.1	23819.6	32028.6	34392.9
Unknown#bth pae 064	-	ID0197	209.678	299.81	354.109	302.975	349.53	366.3	369.783	185.117	510.674	348.966	288.837	571.377	1613.23	1801.97	1441.03	1364.69	1672.13	1803.88	442.164	364.086	295.979	195.142	317.948	285.354
Unknown#bth pae 065	-	ID0198	0	0	0	0	0	0	0	0	0	0	0	0	1372.66	1479.86	1827.96	1080.39	1735.65	1843.19	1184.23	1196.68	649.788	650.668	983.83	1141.99
Unknown#bth pae 066	-	ID0200	742364	646773	848234	461522	1.12218e+06	308659	135456	464108	381089	423718	244142	276365	89633	34009	49413.2	54165.8	67151.6	59018.2	609829	771709	444839	774893	278995	547323
Unknown#bth pae 067	-	ID0203	1038.3	966.482	873.711	832.771	1640.74	1493.77	1130.23	292.435	1162.27	710.709	1550	775.398	1468.56	1486.51	2368.64	1737.59	1866.79	1919.83	489.43	829.272	70.4632	952.772	1510.97	1449.88
Unknown#bth pae 068	-	ID8047	7444.66	10482.1	35355	6222.26	59085.5	25614.9	4272.6	1930.8	6874.07	4922.25	4684.15	9440.56	15070.2	9661.15	9531.23	6862.58	7314.23	10362.3	10757.7	3701.62	19010	14438.7	4268.24	25701.5
Unknown#sst cgl 002	-	ID9002	5610.46	5836.38	5581.71	5529.9	6440.67	3876.4	1047.15	743.246	782.702	1144.59	1210.98	931.513	0	0	0	0	0	0	0	0	0	0	0	0
Unknown#sst cgl 004	-	ID9004	119.938	69.4661	152.252	84.9854	185.291	148.815	924.507	692.607	583.495	429.41	576.14	405.038	0	0	0	0	0	0	0	0	0	0	0	0
Unknown#sst cgl 008	-	ID9008	6793.49	18625.1	24765.7	15255.2	46873.8	96463.5	137211	53010.9	40913.7	77914.7	176749	50679.6	249416	302988	146734	141329	214136	252436	53613.4	45602.4	51066.7	75065.6	142272	119901
Unknown#sst cgl 011	-	ID9011	0	0	0	0	0	0	0	0	0	0	0	0	1703.88	2126.53	2162.09	1197.91	1422.26	1220.08	3682.03	3337.76	2836.21	596.569	2857.02	3394.2
Unknown#sst cgl 015	-	ID9015	0	0	0	0	0	0	0	0	0	0	0	0	525.724	639.782	599.142	555.742	539.697	636.773	151.674	198.035	103.005	168.12	252.188	299.297
Unknown#sst cgl 020	-	ID9020	0	0	0	0	0	0	247.17	223.443	239.994	287.534	256.633	215.661	0	0	0	0	0	0	0	0	0	0	0	0
Unknown#sst cgl 027	-	ID9027	249.096	341.555	669.773	456.416	602.175	468.026	1597.42	1115.6	771.377	738.574	1095.82	1097.49	0	0	0	0	0	0	0	0	0	0	0	0
Unknown#sst cgl 035	-	ID9035	1766.65	3506.94	4580.42	3422.28	5997.51	3275.67	1486.28	650.304	1876.62	1332.55	1372.6	1355.79	4431.62	4005.09	3213.23	3386.62	3632.21	4048.36	1640.8	1626.4	1251.67	694.72	1529.67	1954.7
Unknown#sst cgl 037	-	ID9037	1291.29	1983.09	3132.79	1293.64	3301.76	2496.82	1649.16	1537.46	1160.97	1714.72	1856.36	1123.94	5475.09	4183.75	2839.92	3103	4017.12	4190.33	8877.13	6132.95	6347.72	4948.98	5667.42	8870.85
Unknown#sst cgl 038	-	ID9038	15135	22592.4	33782.6	17557.3	35862.8	33791.8	38234.8	15474.8	19171.6	22002.5	25831.7	18859.1	41667.6	40439.8	33040.1	34533.1	49972	51709	136378	73439.2	37386.6	24086	33723.9	39472.2
Unknown#sst cgl 040	-	ID9040	171.173	226.349	94.9978	220.92	194.258	80.6078	5121.24	3412.5	2796.16	3559.72	4008.7	3437.36	100.742	118.954	130.346	75.3875	144.12	140.249	634.89	889.441	772.915	458.19	1029.66	1109.73
Unknown#sst cgl 041	-	ID9041	0	0	0	0	0	0	1853.38	1307.15	1808.32	1919.97	2210.46	1569.54	0	0	0	0	0	0	0	0	0	0	0	0
Unknown#sst cgl 044	-	ID9044	5296.11	6985.03	7950.37	7298.34	7794	26732.7	13930.4	16744.6	12445.1	15119.9	14391.3	13310.6	0	0	0	0	0	0	0	0	0	0	0	0
Unknown#sst cgl 052	-	ID9052	0	0	0	0	0	0	0	0	0	0	0	0	0	0	0	0	0	0	0	0	0	0	0	0
Unknown#sst cgl 053	-	ID9053	3369.47	3366.75	2690.75	2807.67	2389.65	8454.57	5334.33	8281.81	4987.32	6099.02	5597.34	4389.24	11110.6	10231	10214.7	10110.2	11829.9	10435.7	2026.53	8764.43	6183.64	4402.69	6272.41	4924.61
Unknown#sst cgl 075	-	ID9075	1969.13	2862.75	2929.2	2487.43	3047.28	5006.83	9771	5521.32	5371.66	6130.81	7298.8	5855.13	6911.94	8179.83	7382.42	8827.07	10537	9107.14	10304.5	9885.11	4635.52	4699.93	7982.92	8883.93
Unknown#sst cgl 076	-	ID9076	154.924	211.128	178.415	302.828	209.009	194.91	239.7	295.923	411.486	604.04	445.201	497.863	0	0	0	0	0	0	0	0	0	0	0	0
Unknown#sst cgl 081	-	ID9081	314.855	241.774	262.83	200.657	255.456	782.787	1230.67	681.442	833.596	871.228	1161.53	928.696	34837.1	23698.2	15052.2	8908.86	8361.91	20093.6	1453.19	2723.68	455.116	1345.24	1477.82	2118.35
Unknown#sst cgl 090	-	ID9090	3873.72	4116.26	4702.6	4605.53	5451.98	14357.4	23071	19600.4	14694.5	19906.7	19865.5	16348.3	22487.2	31412.4	28519.6	36246.8	35523	34032.5	38129.8	57362.3	29583.7	35115.9	58770.5	39622
Unknown#sst cgl 094	-	ID9094	1486.88	2223.22	2411.61	1884.81	3138.91	7561.5	9642.46	5659.68	7744.34	7941.88	9941.64	8342.16	12636	13465.2	13376.7	14528.6	15744	15630.8	22845.6	21877.1	14321.1	13380.6	18885.2	22171.8
Unknown#sst cgl 095	-	ID9095	351.198	500.067	547.401	468.767	594.899	875.447	6046	2777.91	4960.1	5745.32	6892.3	5151.09	2206.16	2995.66	2631.71	3338.19	3069.94	3058.76	1403.66	2245.77	1466.04	1069.95	2354.42	1908.96
Unknown#sst cgl 100	-	ID9100	818.429	1392.7	1290.89	1905.35	1248	1819	4346.28	2175.75	3857.33	3027.46	3062.95	2970.83	1515.64	1915.67	2510.72	2052.97	2092.76	2370.09	1827.61	1915.24	2236.14	1715.98	2082.3	2429.24
Unknown#sst cgl 107	-	ID9107	443.026	627.801	425.831	673.508	1492.98	854.846	2110.86	1698.67	1646.36	2500.36	2550.89	3202.7	0	0	0	0	0	0	0	0	0	0	0	0
Unknown#sst cgl 109	-	ID9109	246.768	415.231	446.107	405.71	321.381	741.486	793.105	140.661	89.0354	166.615	323.959	153.744	341.142	499.358	341.043	204.785	219.322	414.698	500.53	199.865	365.893	382.127	306.115	252.142
Unknown#sst cgl 117	-	ID9117	3157.84	4276.97	4950.3	3643.63	5229.44	2378.95	2879.64	5146.82	4708.92	8199.34	5253.24	3409.31	0	0	0	0	0	0	0	0	0	0	0	0
Unknown#sst cgl 119	-	ID9119	23504.4	28674.2	37045.5	32145.4	35100.2	32365.7	178727	99284.8	121010	159114	179097	127917	32824.5	32258	22359.6	24405.1	30571.6	31715.9	10725.3	12398.9	22005.3	17507.6	25642.1	26043.6
Unknown#sst cgl 120	-	ID9120	0	0	0	0	0	0	0	0	0	0	0	0	199.916	212.438	232.307	239.775	255.834	243.796	221.33	190.465	122.282	247.261	278.523	356.594
Unknown#sst cgl 121	-	ID9121	7103.64	9959.15	10556.9	10753.6	13320.3	41780	14047	7915.15	9482.56	10523	11277	9359.1	72412.8	91813.5	83204.4	110803	99925.3	94795.3	5604.37	6231.5	3943.8	3742.12	4915.07	5632.63
Unknown#sst cgl 122	-	ID9122	3455.37	4147.94	3952.2	3651.05	4844.69	5278.83	1180.82	575.984	1480.07	1159.83	1221.26	1546.75	5464.39	6723.42	5978.42	8302.3	6623.44	6026.93	0	0	0	0	0	0
Unknown#sst cgl 133	-	ID9133	2452.32	2770.21	5710.38	3030.71	3578.69	3454.33	3733.58	1992.67	3028.5	4026.83	3001.14	2357.61	1360.67	1177.76	1068.51	826.662	1424.22	1619.23	0	0	0	0	0	0
Unknown#sst cgl A04	-	ID9136	449.202	511.605	536.653	472.809	635.522	666.045	1710.02	1153.69	1314.96	1631.88	1609.28	1350.38	1017.36	1475.09	692.967	827.954	825.535	1008.89	1884.47	2537.45	2042.45	2108.07	3362.39	3155.7
Unknown#sst cgl A08	-	ID9137	0	0	0	0	0	0	3535.63	320.248	894.167	537.546	2485.62	1721.6	0	0	0	0	0	0	0	0	0	0	0	0
Unknown#sst cgl A09	-	ID9138	912.932	1178.73	1363.9	1183	1531.03	1517.37	4053.65	1949.53	2209.39	2636.11	2842.61	2247.92	0	0	0	0	0	0	0	0	0	0	0	0
Unknown#sst cgl A10	-	ID9139	596.853	929.479	952.846	1125.53	2130.95	1234.43	3086.05	1228.59	889.759	3284.18	2533.73	2475.47	0	0	0	0	0	0	0	0	0	0	0	0
Unknown#sst cgl A11	-	ID9140	120.216	159.622	170.119	153.961	199.564	100.867	230.719	222.405	153.591	150.949	211.078	168.601	0	0	0	0	0	0	0	0	0	0	0	0
Unknown#sst cgl A15	-	ID9144	715.334	1012.86	1235.33	1108.57	1471.4	1305.48	2655.29	1484.09	1686.26	2009.1	1892.41	1797.77	1134.75	1209.17	826.18	930.873	1152.12	1224.74	994.381	937.094	677.324	470.525	1099.83	1122.72
Unknown#sst cgl A16	-	ID9145	0	0	0	0	0	0	0	0	0	0	0	0	0	0	0	0	0	0	0	0	0	0	0	0
Unknown#sst cgl A17	-	ID9146	4334.94	5551.74	7028.35	6594.26	6828.5	19413.7	25862.5	10629	15149.4	16339.6	17814.5	15266.2	33587.8	36296.5	29093.8	29773.9	37173.7	37161.1	2686.34	2752.95	4305.59	3288.35	4196.65	4101.81
Uracil	C00106	ID0176	13810.5	50812.3	40645.3	31163.4	60504.4	31514.1	71701.1	70167.6	61864.5	71274.9	74347.1	69119.2	35210.8	40423.9	43316.4	39773.8	50098.3	50085.3	39882	57611.7	27747.7	25621.3	26537.7	33395.7
Urea	C00086	ID0177	6986.57	5527.81	6135.55	13641.7	9039.12	5467.8	9648.46	5823.53	8491.01	26608.1	9959.85	7422.13	8971.63	9908.84	9678.1	4781.83	5179.71	5483.97	10720.9	6288.53	5698.48	7179	6572.28	7487.33
Uridine	C00299	ID0178	39356.5	52019.2	45445.2	34823	77544.7	24200.3	86003.8	46095.6	113718	141563	144730	98355.3	29776.6	21415.1	17639	22140.5	30309	28878.8	208309	349209	100711	116691	153226	210838
Uridine-5'-monophosphoric acid	C00105	ID0179	7167.14	13620.6	16937.8	19042.3	11906.8	82182.3	17158.6	205.325	374.864	725.137	2034.44	1348.35	120433	93459.5	99394.9	90568.1	103381	99960.1	14482.8	4592.44	35875.5	1137.83	8223.05	8576.23
Valine	C00183/C06417	ID0180	189997	268808	309740	301200	279009	888037	1.01849e+06	776482	753012	799550	844682	756213	1.20927e+06	1.27398e+06	1.03691e+06	1.03895e+06	1.28384e+06	1.30974e+06	578983	595122	233990	196999	243044	268677
Xanthine	C00385	ID0208	126.627	172.941	278.148	248.207	374.457	250.932	811.728	255.964	389.931	512.347	784.406	420.62	195.347	251.318	132.937	141.313	150.568	164.7	1016.57	613.956	971.045	863.958	327.996	1166.49
Xylitol	C00379	ID0279	1443.42	1775.57	1748.92	1366.73	3766.75	819.172	1212.09	1572.97	1844.8	1949.96	2039.44	936.945	832.886	643.683	739.467	663.609	841.871	756.392	2557.72	4722.86	2714.74	2505.29	1562.25	4268.41
Xylose	C00181/C01394/C01510/C02096/C02205	ID0181	5689.78	8801.52	9488.38	8972.99	9065.3	41101.7	17698.4	12840.5	13167.2	15480.8	17083.8	16001.8	73337.3	78920.6	75837.5	82681.4	81192.7	80036.6	147932	169065	58622	105397	132492	135509
Xylose-1-phosphoric acid	C03737	ID0280	0	0	0	0	0	0	0	0	0	0	0	0	603.049	440.004	320.138	267.792	599.962	527.878	34.2077	109.964	133.118	82.4221	193.544	55.8171
Xylulose	C00310/C00312	ID0182	766.839	844.853	1002.25	996.741	980.115	2728.65	4923.73	3002.11	3639.6	3887.64	4143.51	3552.76	3571.04	3789.14	3713.54	4012.07	4392.01	4327.08	17405.8	18074.3	6118.78	7937.19	11601.1	12536.7
Xylulose-5-phosphoric acid	C00231/C03291	ID0183	1393.62	1632.98	1838.05	1505.66	2041.04	3262	16120.2	7732.65	11765.9	14359.9	16809	12926.4	6104.78	5146.75	5063.75	5211.53	5807.14	5867.3	9732.82	8912.02	11887.4	10501.3	7053.72	15435.8
